# Supplementary material for: Cellulose Nanocrystal/Polydimethylsiloxane hybrid membranes for air dehydration at elevated temperatures
Source: Research Square preprint supplement (doi:10.21203/rs.3.rs-4716356/v1), 2024-10-30
Supplement: Supplementary file 1 [file aa74cc4cc620babee2ab3caf.docx]

Table.1: kinetic diameter and critical temperature of molecules [9], [36]

| **Molecule** | **Kinetic diameter (pm)** | **Critical temperature (K)** |
| --- | --- | --- |
| Water vapor | 250 | 647 |
| Nitrogen | 364 | 126 |
| Oxygen | 346 | 154 |

**Appendix**

Table A.1: Overall 2-way ANOVA results for the effect of concentration and temperature on water vapor permeability

|  | **DF** | **Sum of Squares** | **Mean Square** | **F Value** | **P Value** |
| --- | --- | --- | --- | --- | --- |
| **Concentration** | 3 | 1.40E+08 | 4.67E+07 | 11.26811 | 8.30E-05 |
| **Temperature** | 2 | 2.80E+09 | 1.40E+09 | 337.6921 | 2.67E-18 |
| **Interaction** | 6 | 7.71E+07 | 1.28E+07 | 3.09908 | 0.02161 |
| **Model** | 11 | 3.02E+09 | 2.74E+08 | 66.16209 | 3.35E-15 |
| **Error** | 24 | 9.95E+07 | 4144772 |  |  |
| **Corrected Total** | 35 | 3.12E+09 |  |  |  |

Table A.2: Concentrations means comparison for the water vapor permeability results

|  |  | **MeanDiff** | **SEM** | **q Value** | **Prob** | **Alpha** | **Sig** | **LCL** | **UCL** |
| --- | --- | --- | --- | --- | --- | --- | --- | --- | --- |
| 2% CNC/PDMS | Pure PDMS | 5096.4 | 959.72 | 7.51 | 1.06E-04 | 0.05 | 1 | 2449 | 7743.8 |
| 4% CNC/PDMS | 2% CNC/PDMS | -3439 | 959.72 | 5.068 | 0.00762 | 0.05 | 1 | -6087 | -791.7 |
| 6% CNC/PDMS | 2% CNC/PDMS | -4499 | 959.72 | 6.63 | 5.00E-04 | 0.05 | 1 | -7147 | -1852 |
| 4% CNC/PDMS | Pure PDMS | 1657.2 | 959.72 | 2.442 | 0.33237 | 0.05 | 0 | -990 | 4304.7 |
| 6% CNC/PDMS | Pure PDMS | 597.06 | 959.72 | 0.88 | 0.92398 | 0.05 | 0 | -2050 | 3244.5 |
| 6% CNC/PDMS | 4% CNC/PDMS | -1060 | 959.72 | 1.562 | 0.69015 | 0.05 | 0 | -3708 | 1587.3 |

Sig equals to 1 indicates that the difference of the means is significant at the 0.05 level

Sig equals to 0 indicates that the difference of the means is not significant at the 0.05 level

Table A.3: Overall 2-way ANOVA results for the effect of concentration and temperature on Nitrogen gas permeability

|  | **DF** | **Sum of Squares** | **Mean Square** | **F Value** | **P Value** |
| --- | --- | --- | --- | --- | --- |
| **Concentration** | 3 | 32004.9 | 10668.3 | 32.97032 | 1.12E-08 |
| **Temperature** | 2 | 336814 | 168407 | 520.4613 | 1.72E-20 |
| **Interaction** | 6 | 1882.98 | 313.83 | 0.96989 | 0.4664 |
| **Model** | 11 | 370702 | 33700.2 | 104.1503 | 1.75E-17 |
| **Error** | 24 | 7765.74 | 323.572 |  |  |
| **Corrected Total** | 35 | 378467 |  |  |  |

Table A.4: Concentrations means comparison for the Nitrogen gas permeability results

|  |  | **MeanDiff** | **SEM** | **q Value** | **Prob** | **Alpha** | **Sig** | **LCL** | **UCL** |
| --- | --- | --- | --- | --- | --- | --- | --- | --- | --- |
| 2% CNC/PDMS | Pure PDMS | 80.28131 | 8.47968 | 13.3891 | 4.33E-07 | 0.05 | 1 | 56.8895 | 103.67 |
| 4% CNC/PDMS | Pure PDMS | 58.43356 | 8.47968 | 9.74536 | 2.28E-06 | 0.05 | 1 | 35.0418 | 81.825 |
| 6% CNC/PDMS | Pure PDMS | 58.37444 | 8.47968 | 9.7355 | 2.32E-06 | 0.05 | 1 | 34.9827 | 81.766 |
| 4% CNC/PDMS | 2% CNC/PDMS | -21.84775 | 8.47968 | 3.6437 | 0.07317 | 0.05 | 0 | -45.2395 | 1.544 |
| 6% CNC/PDMS | 2% CNC/PDMS | -21.90686 | 8.47968 | 3.65356 | 0.07213 | 0.05 | 0 | -45.2987 | 1.4849 |
| 6% CNC/PDMS | 4% CNC/PDMS | -0.05911 | 8.47968 | 0.00986 | 1 | 0.05 | 0 | -23.4509 | 23.333 |

Sig equals to 1 indicates that the difference of the means is significant at the 0.05 level

Sig equals to 0 indicates that the difference of the means is not significant at the 0.05 level

Table A.5: Overall 2-way ANOVA results for the effect of concentration and temperature on Selectivity

|  | **DF** | **Sum of Squares** | **Mean Square** | **F Value** | **P Value** |
| --- | --- | --- | --- | --- | --- |
| **Concentration** | 3 | 316.9639 | 105.6546 | 2.51169 | 0.08267 |
| **Temperature** | 2 | 52997.22 | 26498.61 | 629.9423 | 1.82E-21 |
| **Interaction** | 6 | 152.363 | 25.39384 | 0.60368 | 0.72471 |
| **Model** | 11 | 53466.54 | 4860.595 | 115.5493 | 5.19E-18 |
| **Error** | 24 | 1009.563 | 42.06513 |  |  |
| **Corrected Total** | 35 | 54476.11 |  |  |  |

Table A.6: Overall one-way ANOVA results for the effect of concentration on CTE

|  | **DF** | **Sum of Squares** | **Mean Square** | **F Value** | **Prob>F** |
| --- | --- | --- | --- | --- | --- |
| Model | 3 | 3020.417 | 1006.806 | 10.48701 | 0.0038 |
| Error | 8 | 768.04 | 96.005 |  |  |
| Total | 11 | 3788.457 |  |  |  |

Table A.7: Concentrations means comparison for the CTE results

|  |  | **MeanDiff** | **SEM** | **q Value** | **Prob** | **Alpha** | **Sig** |  | **LCL** | **UCL** |
| --- | --- | --- | --- | --- | --- | --- | --- | --- | --- | --- |
| 2% CNC-PDMS | Pure PDMS | -30.7333 | 8.00021 | 5.4328 | 0.02062 | 0.05 | 1 |  | -56.3528 | -5.11385 |
| 4% CNC-PDMS | Pure PDMS | -35.6333 | 8.00021 | 6.29898 | 0.00917 | 0.05 | 1 |  | -61.2528 | -10.0139 |
| 6% CNC-PDMS | Pure PDMS | -40.7667 | 8.00021 | 7.20641 | 0.00412 | 0.05 | 1 |  | -66.3862 | -15.1472 |
| 4% CNC-PDMS | 2% CNC-PDMS | -4.9 | 8.00021 | 0.86618 | 0.92526 | 0.05 | 0 |  | -30.5195 | 20.71948 |
| 6% CNC-PDMS | 2% CNC-PDMS | -10.0333 | 8.00021 | 1.77361 | 0.61331 | 0.05 | 0 |  | -35.6528 | 15.58615 |
| 6% CNC-PDMS | 4% CNC-PDMS | -5.13333 | 8.00021 | 0.90743 | 0.91554 | 0.05 | 0 |  | -30.7528 | 20.48615 |

Sig equals to 1 indicates that the difference of the means is significant at the 0.05 level

Sig equals to 0 indicates that the difference of the means is not significant at the 0.05 level
